# Supplementary material for: Bioinformatics Identification of Regulatory Genes and Mechanism Related to Hypoxia-Induced PD-L1 Inhibitor Resistance in Hepatocellular Carcinoma
Source: MDPI journal article supplement (doi:10.3390/ijms24108720), 2023-05-13
Supplement: s1 [file s1]

**Table S1.** RNAseq GEO Signatures Human enrichment analysis of HSGs and HRGs.

|      | Gene set                                                 | Overlap | Adjusted <i>P</i> -value | Genes                                                                                                                                                                                                                                | Databases                                  |
|------|----------------------------------------------------------|---------|--------------------------|--------------------------------------------------------------------------------------------------------------------------------------------------------------------------------------------------------------------------------------|--------------------------------------------|
| HSGs | Rb Immunity<br>Downregulating<br>Pd-L1 GSE109724<br>1    | 12/250  | 0.022                    | TPX2*; KIF20A*; CENPA*; DLGAP5*;<br>LMNB1*; HILPDA; TM4SF1; GNAZ; CDK1;<br>HMGB2; KDELR3; APOBEC3B                                                                                                                                   | RNAseq_Automatic_GEO_Signatures_Human_Down |
| HSGs | Rb Immunity<br>Downregulating<br>Pd-L1 GSE109724<br>3    | 12/250  | 0.022                    | LMNB1*; HILPDA; TM4SF1; ZNF143;<br>SERPINB1; CDCA4; PDGFA; SFN; EPPK1;<br>SOX12; DKK1; SOX4                                                                                                                                          | RNAseq_Automatic_GEO_Signatures_Human_Down |
| HRGs | Rb Immunity<br>Downregulating<br>Pd-L1 GSE109724<br>1    | 16/250  | $3.982 \times 10^{-4}$   | CENPA*; LMNB1*; TPX2*; KIF20A*;<br>DLGAP5*; KIFC1; TNFAIP8L1; RAD54L;<br>CDCA3; DHCR24; PSRC1; PBK; NUSAP1;<br>FAM64A; KIF2C; FAM72D                                                                                                 | RNAseq_Automatic_GEO_Signatures_Human_Down |
| HRGs | Rb Immunity<br>Downregulating<br>Pd-L1 GSE109724<br>3    | 14/250  | 0.009                    | PRDM8; DUSP5; SEMA4B; PDGFB; NDRG1;<br>VEGFA; FOSL1; ABTB1; GPRC5A; PLCH2;<br>ARHGEF2; ITGA5; RIN2; EPHA2                                                                                                                            | RNAseq_Automatic_GEO_Signatures_Human_Down |
| HRGs | Tissue-Resident<br>Pancreas Pd-1<br>Pd-L1 GSE135582<br>3 | 29/250  | $2.008 \times 10^{-12}$  | PPP1R15A; USP36; CSRNP2; ANKRD37;<br>PFKFB3; METRNL; HERPUD1; RND1;<br>ZFP36; RASD1; SERTAD1; NAMPT;<br>PMAIP1; DNAJB9; PIM3; TSPYL2; EGR1;<br>DUSP5; GABARAPL1; WSB1; FOS;<br>TUBA4A; FOSL2; VEGFA; PER1; DDIT3;<br>MAFF; JMY; FOSB | RNAseq_Automatic_GEO_Signatures_Human_Up   |
| HRGs | Tissue-Resident<br>Pancreas Pd-1<br>Pd-L1 GSE135582<br>1 | 14/250  | 0.004                    | TSPYL2; USP36; GABARAPL1; PFKFB3;<br>ARID5A; FOS; METRNL; NDRG1; FOSL2;<br>PER1; ZFP36; NAMPT; IDS; PMAIP1                                                                                                                           | RNAseq_Automatic_GEO_Signatures_Human_Up   |
| HRGs | Rb Immunity<br>Downregulating<br>Pd-L1 GSE109724<br>1    | 12/250  | 0.023                    | TSPYL2; ARRDC4; KLF10; PPP1R15A;<br>EGR1; PER1; USP36; DUSP1; MAFF; FOSB;<br>FOS; ALOXE3                                                                                                                                             | RNAseq_Automatic_GEO_Signatures_Human_Up   |

<sup>1</sup> \*Represents duplicate genes in HSGs and HRGs

**Table S2.** The multiple regression model identified 14 effector genes affecting the PD-L1 expression: Coefficient associated with the expression level of effector gene, the corresponding t-score and *p*-value.

| Effector gene | Co-efficient, b | t      | <i>p</i>               |
|---------------|-----------------|--------|------------------------|
| const         | 0.076           | 1.897  | 0.059                  |
| DLGAP5        | 0.443*          | 3.6    | 3.636×10 <sup>-4</sup> |
| NDC80         | 0.41*           | 3.292  | 0.001                  |
| LMNB1         | 0.317*          | 3.062  | 0.002                  |
| FAM13A        | 0.261           | 5.893  | 8.770×10 <sup>-9</sup> |
| FOS           | 0.24            | 5.369  | 1.434×10 <sup>-7</sup> |
| GABARAPL1     | 0.23            | 4.595  | 6.004×10 <sup>-6</sup> |
| PIK3R1        | 0.145           | 2.57   | 0.011                  |
| EPHA2         | 0.121           | 2.593  | 0.01                   |
| NEDD4L        | -0.096          | -2.008 | 0.045                  |
| CABYR         | -0.123          | -2.971 | 0.003                  |
| HGFAC         | -0.15           | -3.599 | 3.652×10 <sup>-4</sup> |
| ALDH5A1       | -0.264          | -5.006 | 8.740×10 <sup>-7</sup> |
| KIF20A        | -0.418*         | -3.472 | 5.803×10 <sup>-4</sup> |
| TPX2          | -0.434*         | -3.156 | 0.002                  |

<sup>1</sup> \*Represents PD-L1 regulator genes with the top five coefficient magnitudes

**Table S3.** Kaplan-Meier survival analysis and ROC of hub genes and PD-L1 regulator genes of hepatocellular carcinoma

| Gene name  | Hub gene | Regression | OS PD-L1 | RFS                    | PFS                    | DSS                    | Response to PD-L1 inhibitor |
|------------|----------|------------|----------|------------------------|------------------------|------------------------|-----------------------------|
| CCNB1      | √        |            | 0.3      | 1.2×10 <sup>-4</sup> * | 6.9×10 <sup>-6</sup> * | 5.3×10 <sup>-4</sup> * | 0.3                         |
| BUB1B      | √        |            | 0.33     | 0.014*                 | 1.1×10 <sup>-4</sup> * | 1.2×10 <sup>-4</sup> * | 0.33                        |
| KIF4A      | √        |            | 0.85     | 0.005*                 | 2.6×10 <sup>-4</sup> * | 1.7×10 <sup>-4</sup> * | 0.37                        |
| KIF11      | √        |            | 0.51     | 6.8×10 <sup>-4</sup> * | 2.6×10 <sup>-5</sup> * | 4.0×10 <sup>-4</sup> * | 0.24                        |
| CENPA*     | √        |            | 0.094    | 0.009*                 | 0.001*                 | 4.1×10 <sup>-4</sup> * | 0.22                        |
| POLE2*     | √        |            | 0.081    | 0.77                   | 0.087                  | 0.029*                 | 0.027*                      |
| KIF20A*    | √        | √          | 0.14     | 2.7×10 <sup>-4</sup> * | 1.8×10 <sup>-5</sup> * | 1.6×10 <sup>-4</sup> * | 0.22                        |
| NDC80*     | √        | √          | 0.024*   | 0.017*                 | 0.003                  | 0.004*                 | 0.076                       |
| TPX2*      | √        | √          | 0.03*    | 0.001*                 | 6.6×10 <sup>-6</sup> * | 6.8×10 <sup>-6</sup> * | 0.28                        |
| DLGAP5*    | √        | √          | 0.54     | 0.006*                 | 1.0×10 <sup>-4</sup> * | 1.4×10 <sup>-4</sup> * | 0.38                        |
| FOS        |          | √          | 0.2      | 0.47                   | 0.67                   | 0.71                   | 0.26                        |
| FAM13A     |          | √          | 0.92     | 0.8                    | 0.87                   | 0.77                   | 0.08                        |
| ALDH5A1    |          | √          | 0.35     | 0.13                   | 0.033*                 | 0.023*                 | 0.31                        |
| GABARAPL1* |          | √          | 0.096    | 0.23                   | 0.007*                 | 0.002*                 | 0.016*                      |
| CABYR      |          | √          | 0.17     | 0.07                   | 0.089                  | 0.1                    | 0.15                        |
| PIK3R1*    |          | √          | 0.74     | 0.05*                  | 0.13                   | 0.007*                 | 0.04*                       |
| HGFAC      |          | √          | 0.52     | 0.023*                 | 0.026*                 | 0.14                   | 0.26                        |

|        |   |      |       |        |        |      |
|--------|---|------|-------|--------|--------|------|
| LMNB1* | √ | 0.1  | 0.03* | 0.002* | 0.018* | 0.5  |
| EPHA2  | √ | 0.88 | 0.12  | 0.051  | 0.22   | 0.12 |
| NEDD4L | √ | 0.36 | 0.68  | 0.91   | 0.7    | 0.4  |

<sup>1</sup> \*Represents hub genes and PD-L1 regulator genes with the top five coefficient magnitudes  
RFS: Relapse-Free Survival; PFS: Progression-Free Survival; DSS: Disease-Specific Survival

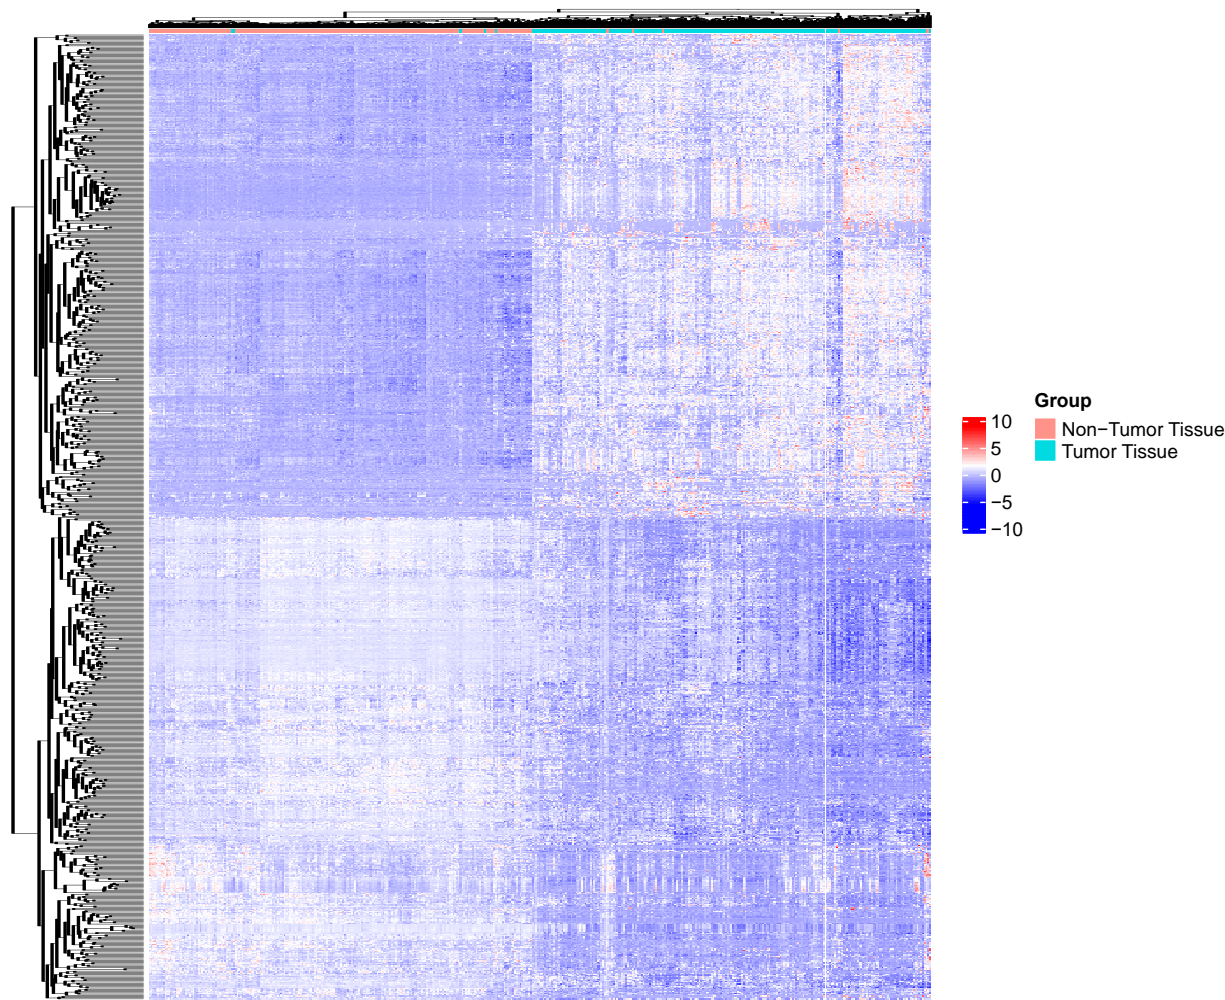

Figure S1 Heatmap for HSGs expression levels

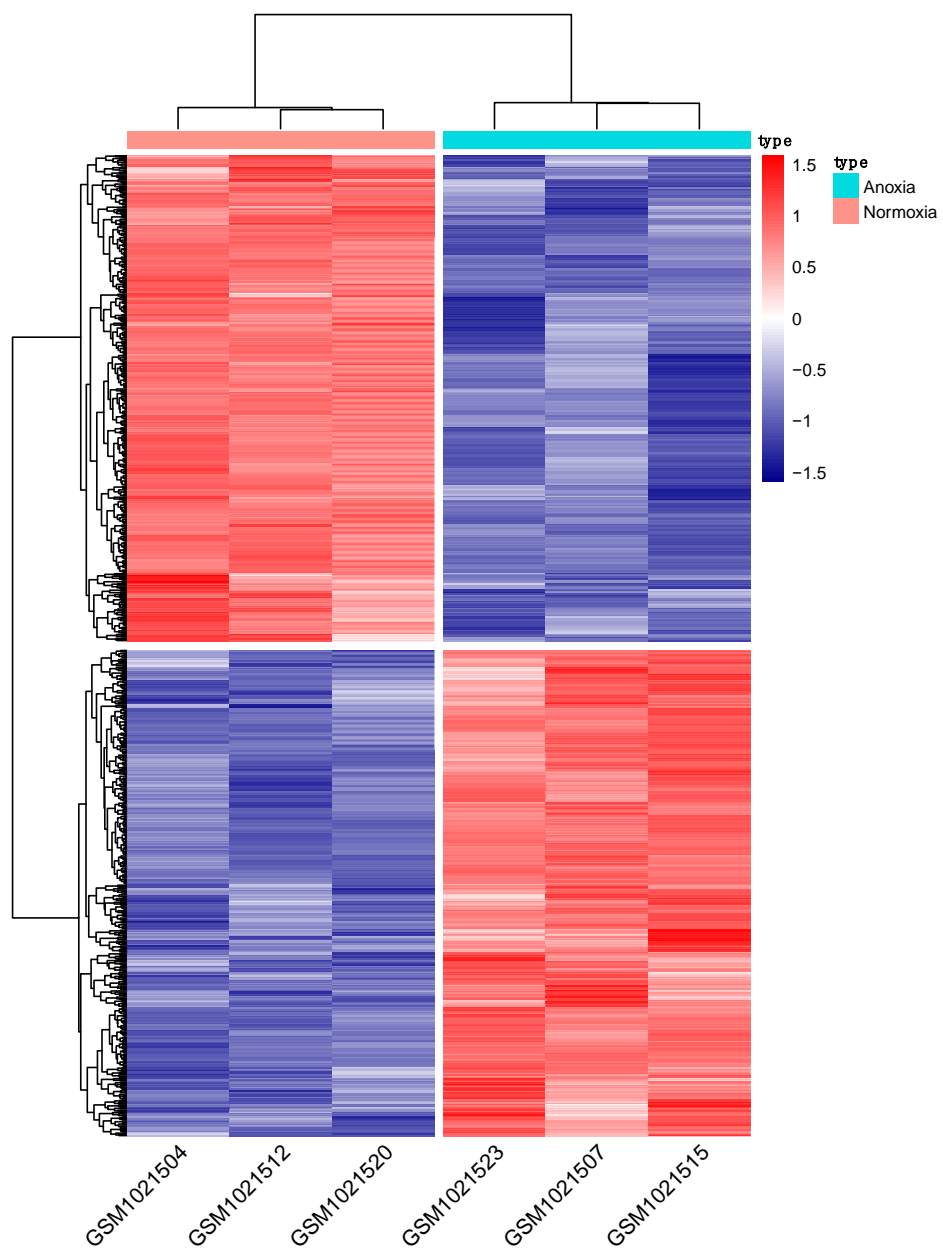

Figure S2 Heatmap for HRGs expression levels

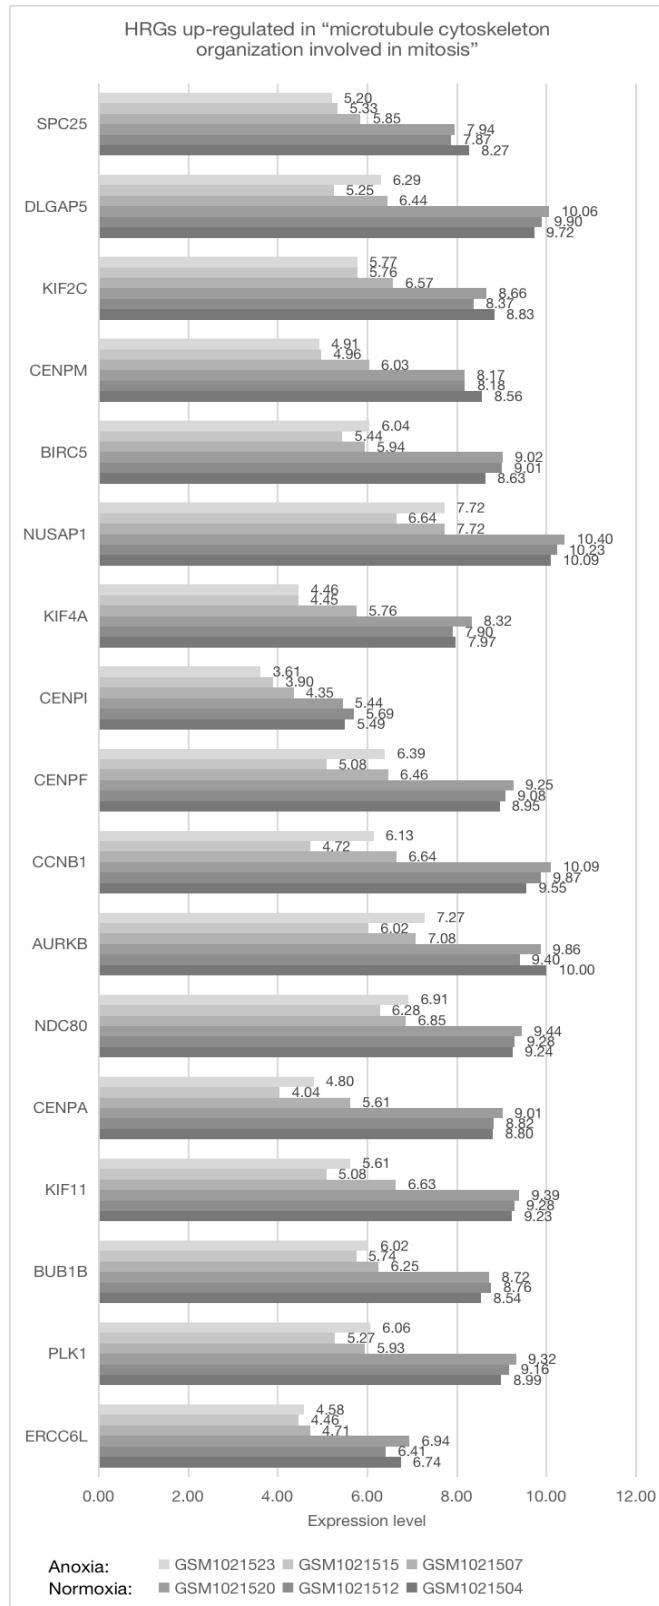

Figure S3 Bar chart of expression profiles of HRGs up-regulated in "microtubule cytoskeleton organization involved in mitosis"
